# Supplementary material for: Identification of EGF Receptor and Thrombospondin-1 as Endogenous Targets of ER-Associated Degradation Enhancer EDEM1 in HeLa Cells
Source: MDPI journal article supplement (doi:10.3390/ijms241512171), 2023-07-29
Supplement: s1 [file s1]

**Table S1.** Sequence of primers and siRNAs used in this study

| name                 | sequence (5'-3')                       |
|----------------------|----------------------------------------|
|                      |                                        |
| GAPDH RT             | CTCTTCCTCTTGTGCTCTTGC                  |
| GAPDH r              | CCATGAGGTCCACCACCC                     |
| GAPDH f              | CCACAGTCCATGCCATCAC                    |
| EDEM1 r              | CTGCAGTCCAGGGAAAAAG                    |
| EDEM1 f              | GTGGAATTTGGGATTCTGAGTC                 |
| EDEM1RT              | CATTTCAGACTGGACTTTGGC                  |
| XBP1 RT              | GAAGTACAGACAGGCTTCTCTGCTATC            |
| XBP1s f              | GTGCGTAGTCGACAGCTATGGTGGTGGTG          |
| XBP1s r              | GGATCATTCCTCGAGCACTAATCAGCTGGG         |
|                      |                                        |
| Luciferase sense     | CGUACGCGGAUACUUCGAdTdT                 |
| Luciferase antisense | UCGAAGUAUUCCGCGUACGdTdG                |
| EDEM1 #1 antisense   | UUUCACUGCUCGUCUGGCCdTdT                |
| EDEM1 #1 sense       | GGCCAGACGAGCAGUGAAAdTdT                |
| EDEM1 #2 antisense   | UUGGAGUCAGUUUAUUAUUCdTdT               |
| EDEM1 #2 sense       | GAAUAAUAACUGACUCCAAdTdT                |
|                      |                                        |
| EGFR-HA f            | ACCGAGATCTCTCGAATGCGACCCTCCGGGACGGC    |
| EGFR-HA r            | TGGGTAGCCGGTACCTGCTCCAATAAATTCAGTCTTTG |
| EGFR-HA RT           | CTAAGAGCTAATGCGGGCATGGCTG              |
|                      |                                        |
| EDEM1-Flag NotI f    | CTTTAAAATAATGCCCCGCGGCCGCCGC           |
| EDEM1Flag HpaI r     | CCCGGGTGGCATCCCTGTTAACCCTCC            |
